# Supplementary material for: Exposure to negative socio-emotional events induces sustained alteration of resting-state brain networks in the elderly
Source: Research Square preprint supplement (doi:10.21203/rs.3.rs-91196/v2), 2020-11-03
Supplement: Supplementary file 1 [file 4ad5b90efe264629fa749b31.pdf]

## Supplementary information

### Exposure to negative socio-emotional events induces sustained alteration of resting-state brain networks in the elderly

#### Authors:

Sebastian Baez Lugo<sup>1,2</sup>, Yacila I. Deza-Araujo<sup>1,2</sup>, Fabienne Collette<sup>3</sup>, Patrik Vuilleumier<sup>1,2</sup>, Olga Klimecki<sup>1,4</sup> and the Medit-Ageing Research Group

#### Affiliations:

<sup>1</sup> Swiss Center for Affective Sciences, University of Geneva, Geneva, Switzerland.

<sup>2</sup> Laboratory for Behavioral Neurology and Imaging of Cognition, Department of Neuroscience, Medical School, University of Geneva, Geneva, Switzerland.

<sup>3</sup> GIGA-CRC In Vivo Imaging Research Unit, University of Liège, Liège, Belgium.

<sup>4</sup> Psychology Department, Technische Universität Dresden, Dresden, Germany.

---

**Supplementary Table 1:** Inclusion and exclusion criteria for the Age-Well clinical trial

**Supplementary Table 2:** Categorization of the thought probe

**Supplementary Table 3:** Regions significantly activated during the SoVT-Rest (videos and rest periods)

**Supplementary Fig. 1:** Significant brain activations during the SoVT-Rest (main effects)

**Supplementary Fig. 2:** Significant brain activations during rest periods after LE videos in contrast to rest periods after HE videos

**Supplementary Fig. 3:** Age-related SoVT differences

**Supplementary Fig. 4:** Correlation between empathic concern (IRI) and aMPFC-I.AI during rest periods after HE > LE videos

**Supplementary Fig. 5:** Second-level mask

**Supplementary Table 1. Inclusion and exclusion criteria for Age-Well clinical trial (adapted from Poisnel et al., 2018)**

***Inclusion criteria***

- Age  $\geq 65$  years
- Autonomous
- Living at home
- Educational level  $\geq 7$  years (from the Preparatory Course -1st grade- included)
- Registered to the social security system
- Motivated to effectively participate in the project and signing the informed consent form
- Performance within the normal range on standardized cognitive tests according to agreed study-specific standards (age, sex and education level when available)
- Native French speaker
- Available to attend the intervention for the trial duration (24 months)
- Retired for at least one year
- No strong preference or aversion for an intervention group
- No present or past regular or intensive practice of meditation or comparable practices; the practice is considered as regular and/or intensive if i) it occurs more than one day per week for more than six consecutive months over the last 10 years, and/or in case of more than five consecutive days of intensive practice (internship or retreat) over the past 10 years, and/or of more than 25 days of retreats (cumulatively) within the last 10 years
- Not speaking fluent English

***Exclusion criteria***

- Safety concerns in relation to MR scanning (claustrophobia, ferro- magnetic object) or PET scanning (blood sampling to check hepatic and renal functions are performed before the PET scans; known hypersensitivity to Amyvid or Glucotep)
- Presence of a major neurological or psychiatric disorder (including an addiction to alcohol or drugs)
- History of cerebral disease (vascular, degenerative, physical malformation, tumor, or head trauma with loss of consciousness for more than an hour)
- Presence of a chronic disease or acute unstable illness (respiratory, cardiovascular, digestive, renal, metabolic, hematologic, endocrine or infectious)
- Current or recent medication that may interfere with cognitive functioning (psychotropic, antihistaminic with anticholinergic action, anti- Parkinson's, benzodiazepines, steroidal anti-inflammatory long-term treatment, antiepileptic or analgesic drugs), the interfering nature of the different treatments being at the discretion of the investigating doctor
- Being under legal guardianship or incapacitation
- Participation in another biomedical research protocol including the injection of radiopharmaceuticals
- Physical or behavioral inability to perform the follow-up visits as planned in the study protocol

**Supplementary Table 2. Categorization of the thought probes**

| Categories                                         | Labels             | Criteria                                                                                                                                                                  | Intra-group variability                                                     |                                                                             | Inter-rater reliability                  |                                          |
|----------------------------------------------------|--------------------|---------------------------------------------------------------------------------------------------------------------------------------------------------------------------|-----------------------------------------------------------------------------|-----------------------------------------------------------------------------|------------------------------------------|------------------------------------------|
|                                                    |                    |                                                                                                                                                                           | LE % (n=110)                                                                | HE % (n=109)                                                                | LE (n=110)                               | HE (n=109)                               |
| <b>Positive emotions</b>                           | Present/<br>Absent | Presence or absence of items including: Affection, Enthusiasm, Happiness, Humor, Interest, Validation.                                                                    | <b>Present = 40</b><br><b>Absent = 28.18</b><br><b>Undefined = 31.82</b>    | <b>Present = 36.7</b><br><b>Absent = 24.77</b><br><b>Undefined = 38.53</b>  | <b>Kappa = 0.39</b><br><b>p&lt;0.001</b> | <b>Kappa = 0.28</b><br><b>p&lt;0.001</b> |
| <b>Negative emotions</b>                           | Present/<br>Absent | Presence or absence of items including: Anger, Belligerence, Complaining, Criticism, Defensiveness, Disgust, Fear, Sadness, Stonewalling, Threats, Whining, Helplessness. | <b>Present = 37.27</b><br><b>Absent = 45.45</b><br><b>Undefined = 17.27</b> | <b>Present = 54.13</b><br><b>Absent = 27.52</b><br><b>Undefined = 18.35</b> | <b>Kappa = 0.66</b><br><b>p&lt;0.001</b> | <b>Kappa = 0.61</b><br><b>p&lt;0.001</b> |
| <b>Positive social emotions</b>                    | Present/<br>Absent | Presence or absence of items including: Compassion, Curiosity, Empathy, Goodwill, Love, Pride, Social conquest, Solidarity, Sympathy.                                     | <b>Present = 50</b><br><b>Absent = 29.09</b><br><b>Undefined = 20.91</b>    | <b>Present = 66.97</b><br><b>Absent = 16.51</b><br><b>Undefined = 16.51</b> | <b>Kappa = 0.57</b><br><b>p&lt;0.001</b> | <b>Kappa = 0.57</b><br><b>p&lt;0.001</b> |
| Negative social emotions                           | Present/<br>Absent | Presence or absence of items including: Embarrassment, Envy, Depreciation, Domineering, Disdain, Guilt, Jealousy, Self-criticism, Timidity.                               | Present = 1.82<br>Absent = 97.27<br>Undefined = 0.91                        | Present = 2.75<br>Absent = 94.50<br>Undefined = 2.75                        |                                          |                                          |
| Emotion regulation (voluntary control of emotions) | Present/<br>Absent | Presence or absence of strategies willing to voluntarily repress or control the emotions felt.                                                                            | Present = 2.73<br>Absent = 95.45<br>Undefined = 1.82                        | Present = 0.92<br>Absent = 97.25<br>Undefined = 1.83                        |                                          |                                          |
| Temporality                                        | Past or future /   | Presence of elements referring to experiences from the past or the                                                                                                        | Present = 90.91<br>Past or future = 1.82<br>Undefined = 7.27                | Present = 91.74<br>Past or future = 3.67<br>Undefined = 4.59                |                                          |                                          |
|                                                    | Present            | No references to experiences from the past or the future.                                                                                                                 |                                                                             |                                                                             |                                          |                                          |
| <b>Directed attention to oneself</b>               | Present/<br>Absent | Expressed thoughts oriented towards itself or things concerning it.                                                                                                       | <b>Present = 37.27</b><br><b>Absent = 44.55</b><br><b>Undefined = 18.18</b> | <b>Present = 26.61</b><br><b>Absent = 50.46</b><br><b>Undefined = 22.94</b> | <b>Kappa = 0.64</b><br><b>p&lt;0.001</b> | <b>Kappa = 0.52</b><br><b>p&lt;0.001</b> |
| <b>Directed attention to others</b>                | Present/<br>Absent | Expressed thoughts oriented towards others.                                                                                                                               | <b>Present = 54.55</b><br><b>Absent = 28.18</b><br><b>Undefined = 17.27</b> | <b>Present = 59.63</b><br><b>Absent = 17.43</b><br><b>Undefined = 22.94</b> | <b>Kappa = 0.64</b><br><b>p&lt;0.001</b> | <b>Kappa = 0.46</b><br><b>p&lt;0.001</b> |
| Rumination                                         | Present/<br>Absent | Presence or absence of recall and description of images.                                                                                                                  | Present = 10<br>Absent = 84.55<br>Undefined = 5.45                          | Present = 4.59<br>Absent = 88.99<br>Undefined = 6.42                        |                                          |                                          |

Categories based on Coan, J. A., & Gottman, J. M. (2007) and Lindahl and colleagues (2017). LE, Low emotion; HE, High emotion. Cohen's kappa index was calculated for categories with intra-group variability higher than 15% (indicated in bold).

**Supplementary Table 3. Regions significantly activated during the SoVT-Rest (videos and rest periods)**

| Region                                                               | Hemisphere | MNI peak coordinates |     |     | T-score | P(FWE-corr) | k     |
|----------------------------------------------------------------------|------------|----------------------|-----|-----|---------|-------------|-------|
|                                                                      |            | x                    | y   | z   |         |             |       |
| <b>Rest &gt; Videos</b>                                              |            |                      |     |     |         |             |       |
| Angular gyrus / IPL                                                  | R          | 52                   | -58 | 44  | 24.36   | <0.0001     | 744   |
|                                                                      | L          | -50                  | -58 | 46  | 21.66   | <0.0001     | 1148  |
| Supramarginal gyrus (SMG)                                            | L          | -58                  | -44 | 42  | 11.88   | <0.0001     |       |
| Middle cingulate cortex (MCC)                                        | R          | 4                    | -24 | 28  | 16.39   | <0.0001     | 2689  |
| Anterior cingulate cortex (ACC) /<br>Medial prefrontal cortex (MPFC) | L          | -10                  | 38  | 8   | 14.57   | <0.0001     | 6060  |
| Precuneus / Posterior cingulate cortex                               | L          | -8                   | -68 | 38  | 12.96   | <0.0001     | 231   |
|                                                                      | R          | 10                   | -64 | 38  | 10.22   | <0.0001     | 192   |
| Posterior insula (PI) / Central<br>operculum                         | R          | 44                   | -16 | 14  | 9.43    | <0.0001     | 1349  |
| Central operculum                                                    | L          | -54                  | -4  | 12  | 8.69    | <0.0001     | 365   |
| Posterior insula (PI)                                                | L          | -40                  | -18 | 18  | 6.80    | <0.0001     | 86    |
| Anterior insula (AI)                                                 | R          | 36                   | 10  | 10  | 7.84    | <0.0001     | 125   |
|                                                                      | L          | -34                  | 8   | 10  | 6.41    | <0.0001     | 39    |
| Superior motor cortex                                                |            | 0                    | -12 | 64  | 6.37    | <0.0001     | 201   |
| Caudate                                                              | L          | -16                  | 20  | 0   | 6.27    | <0.0001     | 49    |
| Postcentral gyrus                                                    | R          | 42                   | -18 | 48  | 5.69    | <0.0001     | 47    |
|                                                                      | L          | -38                  | -22 | 48  | 5.49    | <0.0001     | 24    |
| <b>Videos: HE &gt; LE</b>                                            |            |                      |     |     |         |             |       |
| Inferior occipital gyrus (IFG)                                       | R          | 48                   | -70 | 2   | 9.73    | <0.0001     | 1185  |
| Lingual gyrus                                                        | L          | -6                   | -66 | 2   | 9.46    | <0.0001     | 11161 |
| Superior parietal lobule                                             | R          | 30                   | -44 | 56  | 8.35    | <0.0001     | 952   |
| Anterior insula (AI)                                                 | L          | -34                  | 8   | 2   | 5.44    | <0.0001     | 887   |
|                                                                      | R          | 38                   | 10  | 4   | 5.75    | <0.0001     | 1046  |
| Caudate (Ventral striatum, VS)                                       | R          | 10                   | 2   | 2   | 6.15    | <0.0001     |       |
| Anterior cingulate cortex (ACC)                                      | L          | -4                   | 24  | 18  | 7.51    | <0.0001     | 589   |
| Superior frontal gyrus (SFG)                                         | L          | -18                  | 52  | 26  | 6.51    | <0.001      | 132   |
| Temporo-parietal junction (TPJ)                                      | L          | -50                  | -22 | 18  | 5.90    | <0.001      | 119   |
| Posterior cingulate cortex (PCC)                                     |            | -2                   | -40 | 22  | 5.86    | <0.0001     | 348   |
| Middle cingulate cortex (MCC)                                        |            | -6                   | -10 | 36  | 5.78    | <0.001      | 140   |
| Middle frontal gyrus (MFG)                                           | R          | 36                   | 4   | 58  | 5.55    | <0.0001     | 349   |
| <b>Rest: Post HE &gt; Post LE</b>                                    |            |                      |     |     |         |             |       |
| Precuneus                                                            | L          | -8                   | -52 | 34  | 8.21    | <0.0001     | 1089  |
| Posterior cingulate cortex (PCC)                                     |            | -12                  | -46 | 24  | 6.44    |             |       |
| Anterior cingulate cortex (ACC)                                      |            | -8                   | 40  | 18  | 7.43    | <0.0001     | 1180  |
| Superior frontal gyrus (SFG) /<br>Medial prefrontal cortex (MPFC)    |            | 6                    | 52  | 20  | 6.89    | <0.0001     |       |
| Superior temporal gyrus (STG)                                        | R          | 50                   | -32 | -2  | 8.49    | <0.0001     | 764   |
|                                                                      | L          | -60                  | -22 | 0   | 6.10    | <0.001      | 117   |
| Supramarginal gyrus (SMG)                                            | L          | -52                  | -46 | 22  | 7.35    | <0.0001     | 532   |
| Anterior insula (AI)                                                 | R          | 30                   | 20  | -12 | 5.33    | 0.01        | 24    |
| Putamen                                                              | L          | -30                  | 2   | -12 | 5.12    | 0.002       | 64    |
| Amygdala                                                             | R          | 22                   | -8  | -12 | 4.67    | 0.03        | 3     |
| Hippocampus                                                          | R          | 22                   | -12 | -10 | 4.59    | 0.03        | 5     |
| <b>Rest: Post LE &gt; Post HE</b>                                    |            |                      |     |     |         |             |       |
| Superior frontal gyrus (SFG)                                         | L          | -20                  | -4  | 74  | 5.81    | 0.01        | 21    |
| Superior/middle frontal gyrus (SFG)                                  | R          | 28                   | 12  | 58  | 5.56    | 0.002       | 54    |
| Parahippocampal (PHG) / Fusiform                                     | L          | -30                  | -42 | -8  | 5.28    | 0.006       | 36    |
| Supramarginal / Sup parietal gyrus                                   | R          | 52                   | -38 | 56  | 5.08    | 0.02        | 12    |
| Precentral gyrus                                                     | R          | 6                    | -24 | 76  | 5.06    | 0.02        | 8     |

P(FWE-corr) indicates the p value resulting from a whole-brain family-wise error (FWE) correction at a voxel level. LE, Low emotion; HE, High emotion; MNI, Montreal Neurological Institute; k, Cluster size. Regions significantly activated during *Videos > Rest* are not reported in the present table due to the widespread activation of this contrast (see Supplementary Fig. 1).

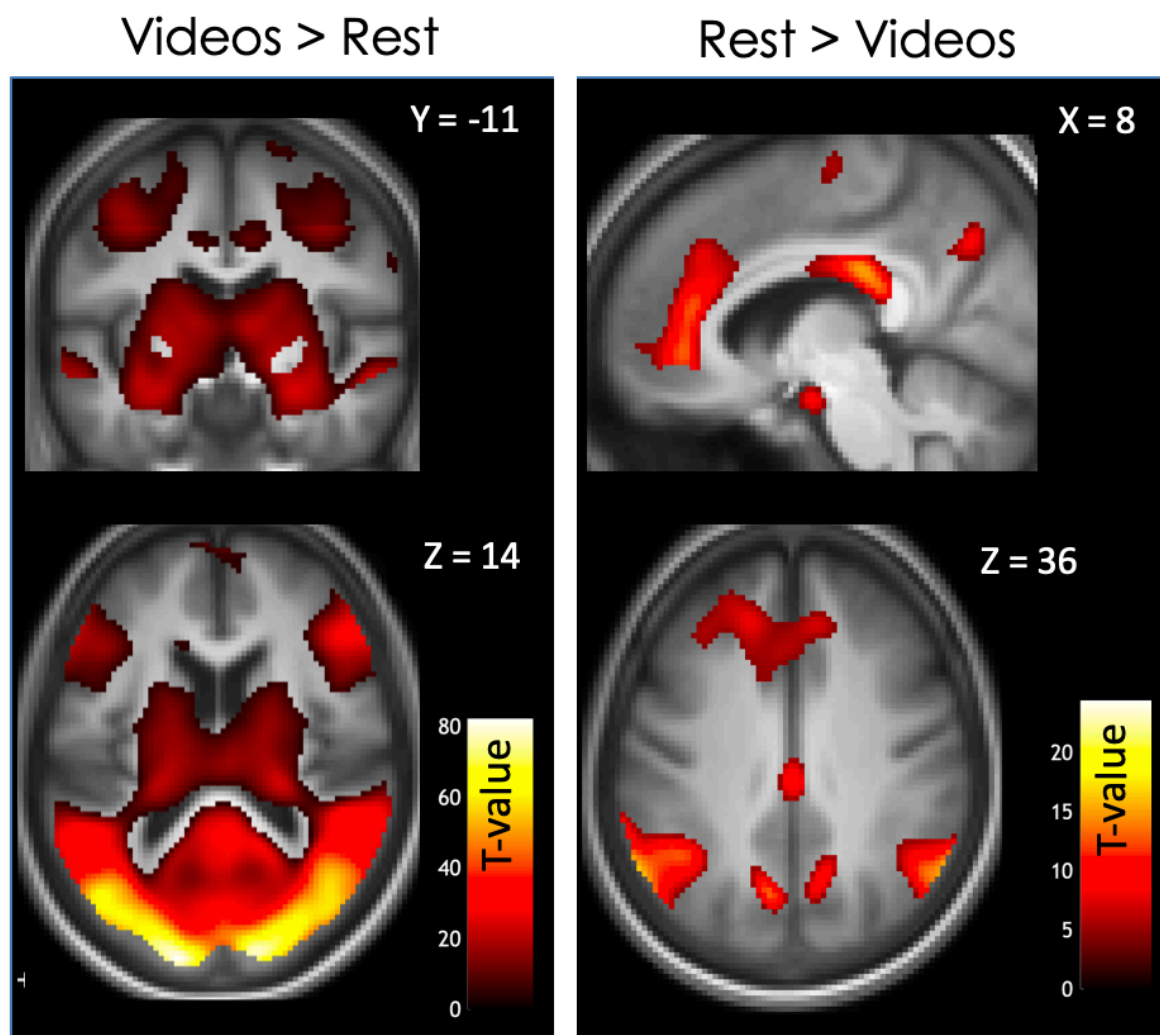

**Supplementary Fig. 1.** Significant brain activations during the SoVT-Rest task blocks (main effects). Results are reported at  $p < 0.05$  FWE-corrected at the voxel level.

## Rest: Post LE > Post HE

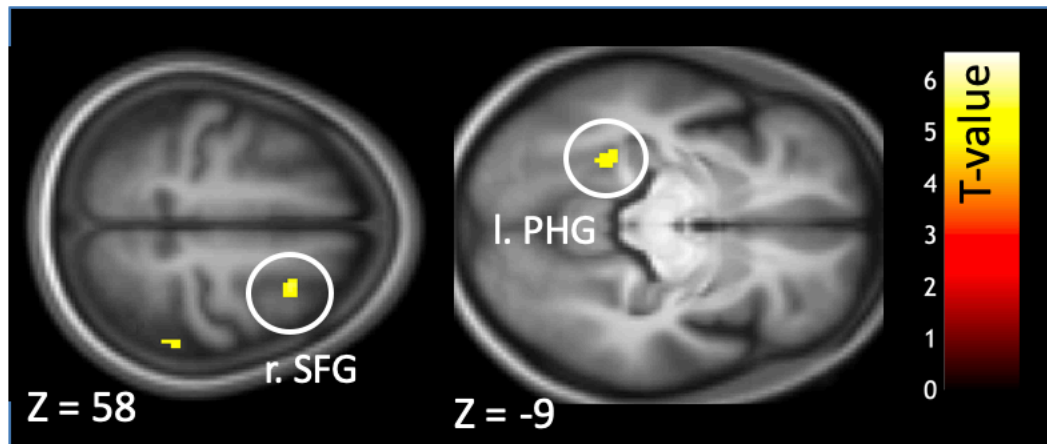

**Supplementary Fig. 2.** Brain regions with greater activation during rest periods after low emotional videos (rest post LE) in contrast to rest periods after high emotional videos (rest post HE). Results are reported at  $p < 0.05$  FWE-corrected at the voxel level. For a full list, see Supplementary Table 2; r.SFG, right superior frontal gyrus; l.PHG, left parahippocampal gyrus.

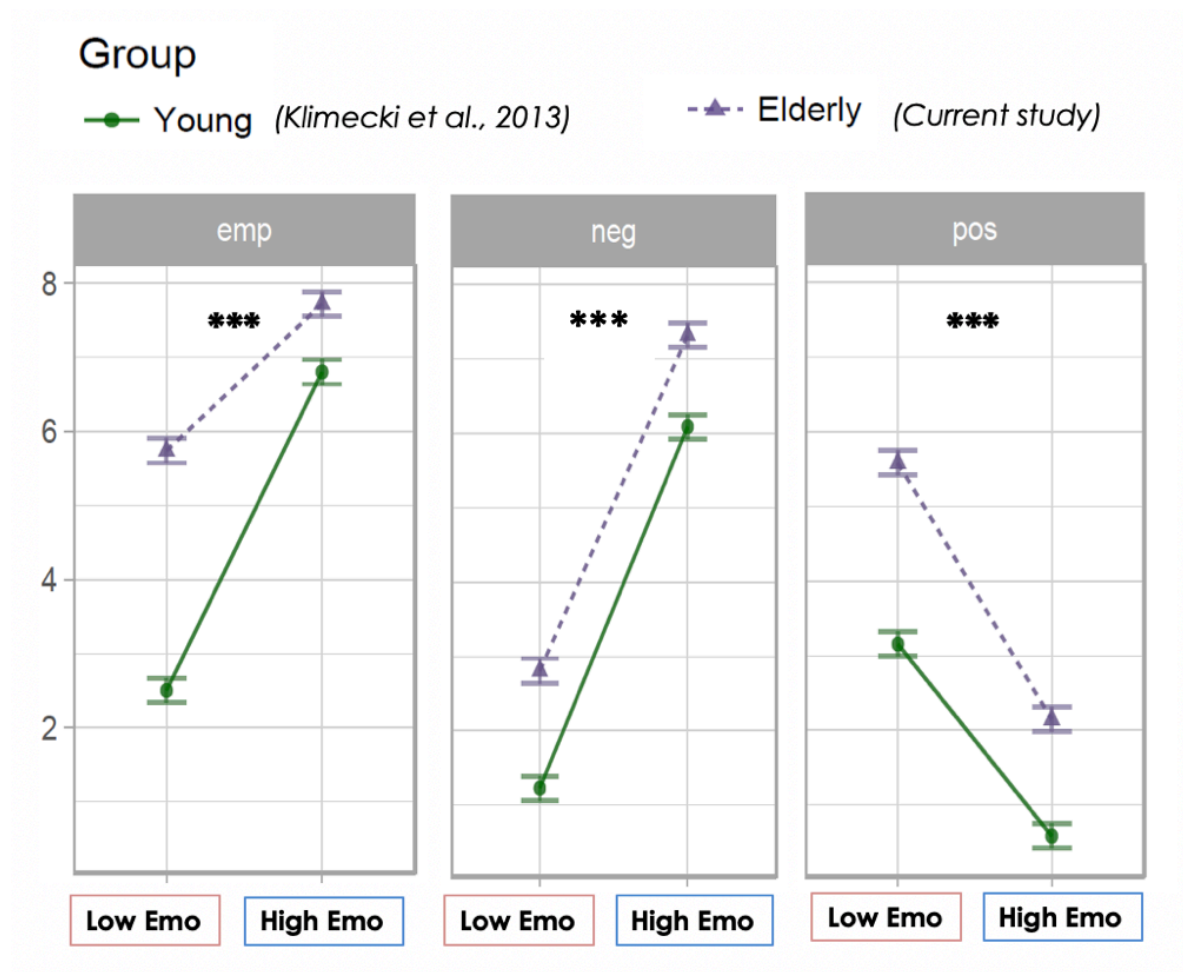

**Supplementary Fig. 3.** Age-related SoVT differences. The young group from Klimecki and colleagues (2013) is shown for comparison (consisting of  $N = 94$  young females between 18 and 35 years of age), together with the elderly group from the present study ( $N = 127$  older adults). \*\*\*= significant group differences  $p < 0.001$ ; emp, empathy; neg, negative; pos, positive self-reports.

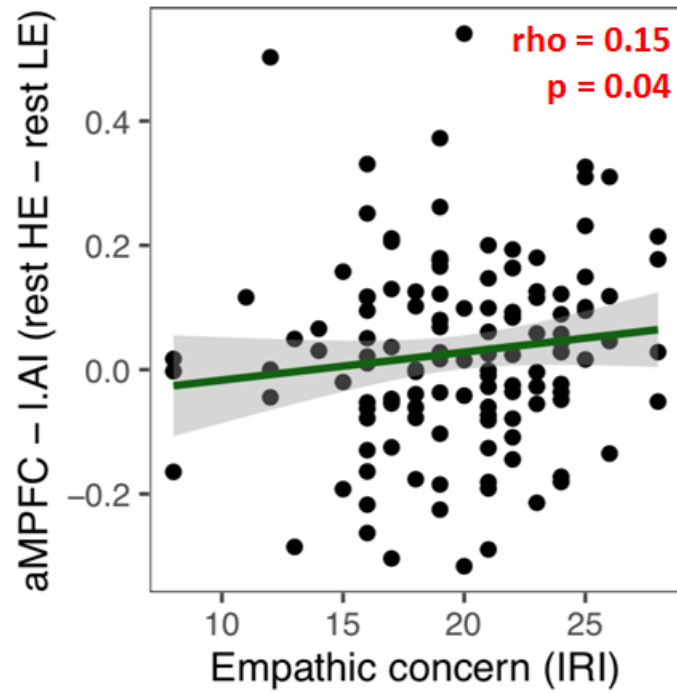

**Supplementary Fig. 4.** Spearman ( $\rho$ ) correlation shows that higher functional connectivity between anterior medial prefrontal cortex and left anterior insula during rest periods after HE > LE videos [aMPFC-l.AI (rest HE-rest LE)] was positively related to the empathic concern subscale of the IRI. Note that this correlation was relatively weak ( $\rho = 0.15$ ,  $p = 0.04$ , one-tailed).



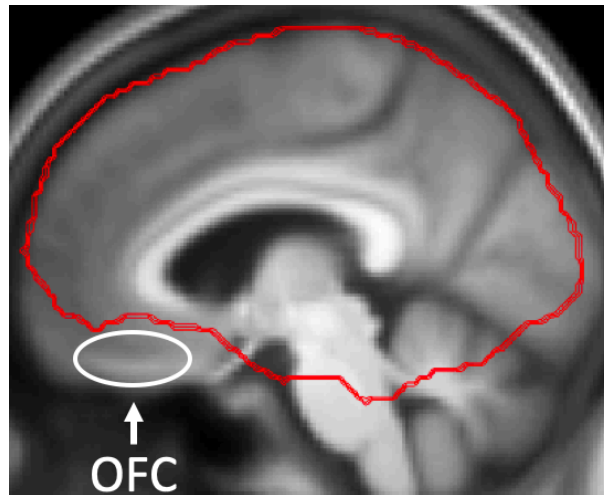

**Supplementary Fig. 5** Group-based mask computed for the second-level GLM analysis. Red line delineates the brain volume (“mask”) comprising all voxels included in the group-level analyses after the pre-processing pipeline applied to individual brain images. Voxels outside the red line were not included in the subsequent brain analyses of fMRI data. Note that this removed large parts of the orbitofrontal cortex (OFC) due to magnetic field inhomogeneity. The structural image was created by averaging all T1 images from our 127 participants.

## Supplementary References

- Poisnel, G., Arenaza-Urquijo, E., Collette, F., Klimecki, O. M., Marchant, N. L., Wirth, M., ... Chételat, G. (2018). The Age-Well randomized controlled trial of the Medit-Ageing European project: Effect of meditation or foreign language training on brain and mental health in older adults. *Alzheimer's and Dementia: Translational Research and Clinical Interventions*, 4, 714–723. <https://doi.org/10.1016/j.trci.2018.10.011>
- Coan, J. A., & Gottman, J. M. (2007). *The Specific Affect Coding System (SPAFF)*. In J. A. Coan & J. J. B. Allen (Eds.), *Series in affective science. Handbook of emotion elicitation and assessment* (p. 267–285). Oxford University Press.
- Lindahl, J., Fisher, N., Cooper, D., Rosen, R., and Britton, W. (2017). “The Varieties of Contemplative Experience: A Mixed-Methods Study of Meditation-Related Challenges in Western Buddhists.” *PLOS ONE* 12(5): e0176239
- Klimecki, O. M., Leiberg, S., Lamm, C., & Singer, T. (2013). Functional neural plasticity and associated changes in positive affect after compassion training. *Cerebral Cortex*, 23(7), 1552–1561. <https://doi.org/10.1093/cercor/bhs142>
